# Supplementary material for: Regulation of PaRBOH1-mediated ROS production in Norway spruce by Ca2+ binding and phosphorylation
Source: Front Plant Sci. 2022 Oct 13;13:978586. doi: 10.3389/fpls.2022.978586 (PMC9608432; doi:10.3389/fpls.2022.978586)
Supplement: Supplementary file 1 [file DataSheet_1.xlsx]

## Sheet: Data S1
Supplementary Data S1. Phosphoproteomic analysis: Identification of PaRBOH1 N-terminus (404 amino acids) and its tryptic peptides by LC-MS after in vitro kinase reactions using soluble cytoplasmic extract or microsomal membrane fraction of developing xylem of Norway spruce as sources for kinases.
For each protein identification, the protein score, the protein sequence coverage and the total peptide sum intensities are shown.
For identified phosphopeptides, the following information are shown: charge, m/z, sequence, phosphorylation site, identification scores, peptide signal intensity, and the LC retention time.
Control: in E. coli produced PaRBOH1 N-terminus without any in vitro kinase reaction.
Soluble kinase: Cytoplasmic extract as a source for soluble kinases used in in vitro kinase assay with PaRBOH1 N-terminus as a substrate.
Membrane kinase: band 1 and band 2: two bands cut out from the SDS-PAGE gel after membrane-bound kinases were used in in vitro kinase reaction followed by SDS-PAGE to separate the PaRBOH1 N-terminus (Figure S2).
TiO2: titanium oxide enrichment.
PaRBOH1_control_01
	protein.Description	protein.score	protein.avgMass	protein.seqCover(%)	protein.MatchedPeptideIntenSum
Protein ID	respiratory burst oxidase protein 1 404 aa N-terminal sequence [Picea abies]	17292.8	44598.2	84.41	106469500
	charge	m/z	peptide.seq	peptide.modification	[M+H]+	peptide.seqStart	peptide.seqLength	peptide.rawScore	peptide.MatchedProductsSumInten	peptide.MatchedProductsString	LC retention time
Peptides ID	3	978.738	GFGTDFNATDQHGQTGIEMETGGNVDR	Phosphoryl+STY(*)	2934.2	1	27	479.166	6357	b7°b9°b12b12°b19-H3PO4y2y3y4*y6°y17y21y27	21.0701
	2	683.842	VAFSGPLSGPLNK	Phosphoryl+STY(4)	1366.68	67	13	1314.59	1096	b11b12-H3PO4b13y2*y4y5y6y7y8y13	28.6449
	4	1133.78	SNGGDEGYVEITLDVMDDSIAVHSVKPAGPGDQEDPEIALLAK	Phosphoryl+STY(19)	4532.11	100	43	2403.3	15606	b1°b2*b3*b5*b6*b7*b8*b9*b10*b12*b13b13*b13°b14*b15b15*y3y4y5y6y7y9y11y12y15*y15°y16y17y18y20y21*y23y23°y26y27-H3PO4y29°y30°y33*y43	29.9058
	4	1241.12	LKEQAEEYAALIMEELDPNHLGYIEIQNLEMLLLELPNENAK	Phosphoryl+STY(23)	4961.42	319	42	2855.66	8511	b2b3b4b4*b5b5*b5°b6b6*b7b8b9b11°b13b14b15b16b17°b18b22b24*b30b42*y1y2y3y3*y4y4*y4°y5y6*y6°y7*y7°y8°y10y10*y15y16*y22*y24°y38	39.2317
	2	692.814	VAFSGPLTGNADR	Phosphoryl+STY(4)	1384.63	41	13	502.368	962	b7-H3PO4b8-H3PO4b9-H3PO4y5y6y12*y13	26.0867
PaRBOH1_control_TiO2_eluate_01
	protein.Description	protein.score	protein.avgMass	protein.seqCover(%)	protein.MatchedPeptideIntenSum
Protein ID	respiratory burst oxidase protein 1 404 aa N-terminal sequence [Picea abies]	3810.82	44598.2	36.14	5065363
	charge	m/z	peptide.seq	peptide.modification	[M+H]+	peptide.seqStart	peptide.seqLength	peptide.rawScore	peptide.MatchedProductsSumInten	peptide.MatchedProductsString	LC retention time
Peptides ID	3	978.744	GFGTDFNATDQHGQTGIEMETGGNVDR	Phosphoryl+STY(4)	2934.2	1	27	174.042	4300	b9*b10-H3PO4b12-H3PO4b14*y1y4y4*y5y5*y6y6°y8y9*y9°y10*	20.9617
	3	978.743	GFGTDFNATDQHGQTGIEMETGGNVDR	Phosphoryl+STY(21)	2934.2	1	27	500.45	2277	b2b5°b6°b7b8°b9b12b12°b14y1y4y4*y5y6*y7-H3PO4y8y8-H3PO4y13*y27-H3PO4	20.677
PaRBOH1_soluble_kinase_01
	protein.Description	protein.score	protein.avgMass	protein.seqCover(%)	protein.MatchedPeptideIntenSum
Protein ID	respiratory burst oxidase protein 1 404 aa N-terminal sequence [Picea abies]	13606	44598.2	77.23	79336740
	charge	m/z	peptide.seq	peptide.modification	[M+H]+	peptide.seqStart	peptide.seqLength	peptide.rawScore	peptide.MatchedProductsSumInten	peptide.MatchedProductsString	LC retention time
Peptides ID	2	466.735	LTSFTKR	Phosphoryl+STY(2)	932.46	172	7	8229.49	45779	b2b2-H3PO4b3-H3PO4b6b7b7-H3PO4y1y2y3y3°y4y4°y5y5°y6y6-H3PO4y7y7-H3PO4	16.9187
	2	588.297	KTSFGSSIIR	Phosphoryl+STY(3)	1175.58	147	10	6445.09	51489	b1b2°b3-H3PO4b4-H3PO4b5-H3PO4b6b6°b6-H3PO4b9b10b10°b10-H3PO4y1y2y3y4y4°y5y5°y6y6°y7y7°y8-H3PO4y9y9-H3PO4y10y10-H3PO4	21.5643
	2	692.816	VAFSGPLTGNADR	Phosphoryl+STY(4)	1384.63	41	13	4014.13	15100	b6-H3PO4b7-H3PO4b8-H3PO4b9-H3PO4b10*b11b12y3y4*y5y5*y6y8y9y10y10-H3PO4y11y11-H3PO4y12y13y13-H3PO4	26.0509
	2	683.84	VAFSGPLSGPLNK	Phosphoryl+STY(4)	1366.68	67	13	3295.65	7679	b5-H3PO4b9-H3PO4b11y2y2*y4y5y6y7y8y9y10y10°y10-H3PO4y11-H3PO4y12-H3PO4y13y13-H3PO4	28.6122
	2	714.828	VAFSGPLSSNVDR	Phosphoryl+STY(4)	1428.65	28	13	3761.49	11067	b7y1y2y3y4y5y6y7y8y10y10-H3PO4y11-H3PO4y12-H3PO4y13y13-H3PO4	26.4412
	2	714.828	VAFSGPLSSNVDR	Phosphoryl+STY(8)	1428.65	28	13	1140.7	5431	b4b7b8-H3PO4b10°b11*y1y2y4y5°y6-H3PO4y7°y8-H3PO4y9y11-H3PO4y13y13-H3PO4	26.0549
	3	978.745	GFGTDFNATDQHGQTGIEMETGGNVDR	Phosphoryl+STY(15)	2934.2	1	27	298.52	5780	b8°b16-H3PO4y15*y15-H3PO4y17°y26y26*y27	21.1006
	2	628.276	KTSFGSSIIR	Phosphoryl+STY(2);Phosphoryl+STY(3)	1255.55	147	10	930.5	1471	b10-H3PO4y2y3y4y5y6y8	25.6085
	2	524.247	TSFGSSIIR	Phosphoryl+STY(2)	1047.49	148	9	713.872	494	b7°y6y6°y7°y8y8°	26.4565
PaRBOH1_soluble_kinase_TiO2_eluate_01
	protein.Description	protein.score	protein.avgMass	protein.seqCover(%)	protein.MatchedPeptideIntenSum
Protein ID	respiratory burst oxidase protein 1 404 aa N-terminal sequence [Picea abies]	2796.37	44598.2	22.03	2128205
	charge	m/z	peptide.seq	peptide.modification	[M+H]+	peptide.seqStart	peptide.seqLength	peptide.rawScore	peptide.MatchedProductsSumInten	peptide.MatchedProductsString	LC retention time
Peptides ID	2	466.736	LTSFTKR	Phosphoryl+STY(2)	932.46	172	7	7870.26	82259	b2b2-H3PO4b3°b5b5°b5-H3PO4b6b6°b6-H3PO4b7b7°b7-H3PO4y1y2y3y3°y4y4°y5y5°y6y6-H3PO4y7y7-H3PO4	16.6405
	2	588.297	KTSFGSSIIR	Phosphoryl+STY(2)	1175.58	147	10	9638.85	40318	b1b2-H3PO4b3b3°b3-H3PO4b4-H3PO4b5b5-H3PO4b6b6°b7b7°b7-H3PO4b8°b9b9-H3PO4b10b10-H3PO4y1y2y3y4y4°y5y5°y6y6°y7y7°y8y8°y9y9°y9-H3PO4y10y10-H3PO4	21.3106
	2	466.736	RLTSFTK	Phosphoryl+STY(6)	932.46	171	7	2768.89	7095	b1b2b3b3°b4b4°b5b5°b6°b6-H3PO4b7b7-H3PO4y1y2-H3PO4y5-H3PO4y6-H3PO4y7y7-H3PO4	17.9957
	2	692.817	VAFSGPLTGNADR	Phosphoryl+STY(4)	1384.63	41	13	8152.48	16037	b4-H3PO4b5-H3PO4b6-H3PO4b7-H3PO4b8°b8-H3PO4b10b10-H3PO4y3y4y4*y5y6y6*y6°y7y8y8*y8°y9y9*y10y10-H3PO4y11y11-H3PO4y12-H3PO4y13y13-H3PO4	25.8482
	2	714.83	VAFSGPLSSNVDR	Phosphoryl+STY(4)	1428.65	28	13	7008.23	5998	b4-H3PO4b7-H3PO4y1y2y3y4y4*y5y5°y6y8y9y10y10-H3PO4y11-H3PO4y12-H3PO4y13y13-H3PO4	26.2323
	2	714.829	VAFSGPLSSNVDR	Phosphoryl+STY(8)	1428.65	28	13	3481.62	3483	b2b13b13-H3PO4y1y2y3y5°y6y6-H3PO4y7-H3PO4y8y8-H3PO4y10y10-H3PO4y11y11-H3PO4y12-H3PO4y13y13-H3PO4	25.8504
	2	524.248	TSFGSSIIR	Phosphoryl+STY(*)	1047.49	148	9	3557.44	1924	y1y2y3y4y5y6y6°y7y8°y9	25.3831
	2	683.84	VAFSGPLSGPLNK	Phosphoryl+STY(4)	1366.68	67	13	650.441	207	y5y6y8y11°	28.3838
	2	692.816	VAFSGPLTGNADR	Phosphoryl+STY(8)	1384.63	41	13	699.074	351	y5y8-H3PO4y9y10y10-H3PO4y13	24.4299
PaRBOH1_membrane-kinase_band-1
	protein.Description	protein.score	protein.avgMass	protein.seqCover(%)	protein.MatchedPeptideIntenSum
Protein ID	respiratory burst oxidase protein 1 404 aa N-terminal sequence [Picea abies]	14143.8	44598.2	59.41	36232480
	charge	m/z	peptide.seq	peptide.modification	[M+H]+	peptide.seqStart	peptide.seqLength	peptide.rawScore	peptide.MatchedProductsSumInten	peptide.MatchedProductsString	LC retention time
Peptides ID	2	588.298	KTSFGSSIIR	Phosphoryl+STY(2)	1175.58	147	10	8900.92	48438	b1b2-H3PO4b3-H3PO4b4-H3PO4b5b5-H3PO4b6b6°b6-H3PO4b7b7°b8°b9b10b10-H3PO4y1y2y3y4y4°y5y5°y6y6°y7y7°y8y8°y9y9°y9-H3PO4y10y10-H3PO4	21.2817
	2	692.817	VAFSGPLTGNADR	Phosphoryl+STY(4)	1384.63	41	13	12288.5	27060	b3b4-H3PO4b5-H3PO4b6-H3PO4b7-H3PO4b8b8°b8-H3PO4b10b10*b13b13*y3y3°y4y4*y5y5*y6y6*y7y7*y8y9y10y10*y10-H3PO4y11y11-H3PO4y12-H3PO4y13y13-H3PO4	25.811
	2	683.842	VAFSGPLSGPLNK	Phosphoryl+STY(4)	1366.68	67	13	8448.05	8210	b4-H3PO4b5-H3PO4b6-H3PO4b8°b8-H3PO4b9b11-H3PO4b12*b13y1y2y2*y4y4*y5y6y6*y7y8y9y10y10-H3PO4y11y11-H3PO4y12-H3PO4y13y13-H3PO4	28.3584
	2	714.829	VAFSGPLSSNVDR	Phosphoryl+STY(4)	1428.65	28	13	8969.26	14534	b6-H3PO4b7b7°b7-H3PO4b8°b8-H3PO4b10y1y2y2°y3y4y4*y5y6y6°y7y8y8°y9y9*y9°y10y10-H3PO4y11y11°y11-H3PO4y12-H3PO4y13y13-H3PO4	26.1959
	2	524.248	TSFGSSIIR	Phosphoryl+STY(2)	1047.49	148	9	2394.08	3666	b9-H3PO4y1y2y3y4y5°y6y8y9y9-H3PO4	25.3355
	2	714.828	VAFSGPLSSNVDR	Phosphoryl+STY(*)	1428.65	28	13	934.863	3569	b2b7y1y2y3y4°y6-H3PO4y7°y8-H3PO4y10y10-H3PO4y13	25.8118
	2	683.84	VAFSGPLSGPLNK	Phosphoryl+STY(8)	1366.68	67	13	503.692	651	b2y5y6y7*y8y8°y9-H3PO4y10-H3PO4y11-H3PO4y13y13-H3PO4	27.7177
	3	584.61	HANTSLNLSQMISQK	Phosphoryl+STY(5)	1751.81	361	15	1118.48	1792	b2b3*b4*b7-H3PO4y2*y3y4°y5y7y7°y8*y9y9*y11-H3PO4y15	24.41
	3	978.744	GFGTDFNATDQHGQTGIEMETGGNVDR	Phosphoryl+STY(15)	2934.2	1	27	176.12	969	b2b5b14b14*y6y7y7*y17°y26*	20.5999
PaRBOBH1_membrane-kinase_band-1_TiO2_eluate_01
	protein.Description	protein.score	protein.avgMass	protein.seqCover(%)	protein.MatchedPeptideIntenSum
Protein ID	respiratory burst oxidase protein 1 404 aa N-terminal sequence [Picea abies]	2189.84	44598.2	22.03	1402775
	charge	m/z	peptide.seq	peptide.modification	[M+H]+	peptide.seqStart	peptide.seqLength	peptide.rawScore	peptide.MatchedProductsSumInten	peptide.MatchedProductsString	LC retention time
Peptides ID	2	588.298	KTSFGSSIIR	Phosphoryl+STY(2)	1175.58	147	10	12402	85283	b1b2-H3PO4b3b3-H3PO4b4-H3PO4b5°b5-H3PO4b6b6°b7b7°b7-H3PO4b8b8°b9b9-H3PO4b10b10-H3PO4y1y2y3y4y4°y5y5°y6y6°y7y7°y8y8°y9y9°y9-H3PO4y10y10-H3PO4	21.3543
	2	692.818	VAFSGPLTGNADR	Phosphoryl+STY(4)	1384.63	41	13	15989	46220	b3b4-H3PO4b5b5-H3PO4b6b6-H3PO4b7b7-H3PO4b8b8°b8-H3PO4b9-H3PO4b10b10°b10-H3PO4b12b13b13°b13-H3PO4y3y3°y4y4*y5y5*y6y6*y6°y7y7°y8y8°y9y9*y9°y10y10-H3PO4y11y11*y11-H3PO4y12y12-H3PO4y13y13-H3PO4	25.8535
	2	714.83	VAFSGPLSSNVDR	Phosphoryl+STY(4)	1428.65	28	13	12873.6	15505	b2b6-H3PO4b7-H3PO4b8b8°b13°b13-H3PO4y1y2y3y3°y4y4*y5y5°y6y6°y7y8y8°y9y9*y9°y10y10°y10-H3PO4y11y11-H3PO4y12-H3PO4y13y13-H3PO4	26.238
	2	466.736	LTSFTKR	Phosphoryl+STY(3)	932.46	172	7	4662.85	6070	b6-H3PO4b7-H3PO4y1y2y3y4y5y5-H3PO4y6y6-H3PO4y7y7-H3PO4	16.5325
	2	466.735	RLTSFTK	Phosphoryl+STY(6)	932.46	171	7	1393.88	2639	b1b2b3°b4°b5°b6-H3PO4b7b7-H3PO4y1y7y7-H3PO4	17.9617
	2	683.842	VAFSGPLSGPLNK	Phosphoryl+STY(4)	1366.68	67	13	4307.34	4599	b2b5-H3PO4b6-H3PO4b8-H3PO4b11-H3PO4y2y2*y4y5y6y6*y7y8y9y10-H3PO4y11y11-H3PO4y12-H3PO4y13y13-H3PO4	28.4092
	2	524.249	TSFGSSIIR	Phosphoryl+STY(2)	1047.49	148	9	3592.13	4879	b1°b9-H3PO4y2y3y4y4°y5y6y6°y7y7°y8y8-H3PO4y9y9-H3PO4	25.3835
	2	714.828	VAFSGPLSSNVDR	Phosphoryl+STY(9)	1428.65	28	13	1912.15	3926	b2b4b9-H3PO4b12y1y2y2°y4y5y5-H3PO4y6-H3PO4y7y7-H3PO4y8y8°y8-H3PO4y10y10-H3PO4y11-H3PO4y13y13-H3PO4	25.8554
	2	714.829	VAFSGPLSSNVDR	Phosphoryl+STY(8)	1428.65	28	13	622.516	1073	y1y4*y5y6-H3PO4y7-H3PO4y8y8-H3PO4y9-H3PO4y10-H3PO4y13	25.3754
	1	1047.48	TSFGSSIIR	Phosphoryl+STY(6)	1047.49	148	9	186.224	510	b1b1°b2°b3°b4b4°b5°b8°y8°	21.3575
PaRBOH1_membrane-kinase_band-2
	protein.Description	protein.score	protein.avgMass	protein.seqCover(%)	protein.MatchedPeptideIntenSum
Protein ID	respiratory burst oxidase protein 1 404 aa N-terminal sequence [Picea abies]	10104	44598.2	56.68	8136349
	charge	m/z	peptide.seq	peptide.modification	[M+H]+	peptide.seqStart	peptide.seqLength	peptide.rawScore	peptide.MatchedProductsSumInten	peptide.MatchedProductsString	LC retention time
Peptides ID	2	692.817	VAFSGPLTGNADR	Phosphoryl+STY(4)	1384.63	41	13	8768.45	11663	b2b4-H3PO4b5-H3PO4b8-H3PO4b9b11-H3PO4b13y2y3y3°y4y4*y5y5*y6y6*y6°y7y7*y8y9y10y10-H3PO4y11y11-H3PO4y12*y13y13-H3PO4	25.7786
	2	588.296	KTSFGSSIIR	Phosphoryl+STY(3)	1175.58	147	10	3724.23	13901	b1b2b2°b3-H3PO4b4-H3PO4b7°b10-H3PO4y1y2y3y4y4°y5y6y6°y7y7°y8-H3PO4y9y9°y9-H3PO4y10y10-H3PO4	21.2739
	2	714.829	VAFSGPLSSNVDR	Phosphoryl+STY(4)	1428.65	28	13	6132.53	7529	b4-H3PO4b7b7-H3PO4y2y3y4y4*y5y6y7y8y9y10y10*y10-H3PO4y11°y11-H3PO4y12-H3PO4y13y13-H3PO4	26.1656
	3	471.585	SKTGAHHALLGLK	Phosphoryl+STY(1)	1412.74	187	13	4644.98	2249	b7b9-H3PO4y1y2y3y4y5y6y8y10y11°y13y13-H3PO4	16.3176
	2	683.841	VAFSGPLSGPLNK	Phosphoryl+STY(4)	1366.68	67	13	3122.52	1644	b2y2y4y5y6y7y8y9y10-H3PO4y11-H3PO4y13y13-H3PO4	28.3272
	2	524.248	TSFGSSIIR	Phosphoryl+STY(*)	1047.49	148	9	1215.8	1224	y1y2y4y5y6y7°y9	25.3067
PaRBOH1_membrane-kinase_band-2_TiO2_eluate_01
	protein.Description	protein.score	protein.avgMass	protein.seqCover(%)	protein.MatchedPeptideIntenSum
Protein ID	respiratory burst oxidase protein 1 404 aa N-terminal sequence [Picea abies]	837.992	44598.2	13.86	173291
	charge	m/z	peptide.seq	peptide.modification	[M+H]+	peptide.seqStart	peptide.seqLength	peptide.rawScore	peptide.MatchedProductsSumInten	peptide.MatchedProductsString	LC retention time
Peptides ID	2	692.816	VAFSGPLTGNADR	Phosphoryl+STY(4)	1384.63	41	13	9281.66	7193	b2b4-H3PO4b5-H3PO4b7-H3PO4y1y2y3y4y4*y5y6y7y8y8*y9y10y10-H3PO4y11y11-H3PO4y12-H3PO4y13y13-H3PO4	25.8683
	2	588.296	KTSFGSSIIR	Phosphoryl+STY(*)	1175.58	147	10	3494.46	3632	b1b2-H3PO4b6°b10b10-H3PO4y1y2y3y4y5y6y7y8°y9-H3PO4y10	21.3771
	2	466.735	LTSFTKR	Phosphoryl+STY(2)	932.46	172	7	4531.46	1345	y1y2y3y4y5°y6y6-H3PO4y7y7-H3PO4	16.5797
	2	714.829	VAFSGPLSSNVDR	Phosphoryl+STY(4)	1428.65	28	13	3763.65	3190	b5-H3PO4b11-H3PO4y1y4y5y5°y6y7y8y9y10y10-H3PO4y11y11-H3PO4y12-H3PO4y13y13-H3PO4	26.2515
	2	524.248	TSFGSSIIR	Phosphoryl+STY(*)	1047.49	148	9	2642.09	803	y1y2y4y5y6y7y9	25.4009
